# Supplementary material for: Combined effects of dissolved organic matter, pH, ionic strength and halides on photodegradation of oxytetracycline in simulated estuarine waters
Source: Royal Society of Chemistry journal article supplement (doi:10.1039/c8em00473k), 2018-12-17
Supplement: c8em00473k1.pdf [file c8em00473k1.pdf]

## Supplementary information

Combined effects of dissolved organic matter, pH, ionic strength and halides on  
photodegradation of oxytetracycline in simulated estuarine waters

Ya-nan Zhang<sup>a</sup>, Jianchen Zhao<sup>a</sup>, Yangjian Zhou<sup>a</sup>, Jiao Qu<sup>\*a</sup>, Jingwen Chen<sup>b</sup>, Chao Li<sup>a</sup>,  
Weichao Qin<sup>a</sup>, Yahui Zhao<sup>a</sup>, Willie J.G.M. Peijnenburg<sup>c,d</sup>

<sup>a</sup>School of Environment, Northeast Normal University, Changchun 130117, China

<sup>b</sup>Key Laboratory of Industrial Ecology and Environmental Engineering (MOE),  
School of Environmental Science and Technology, Dalian University of Technology,  
Dalian 116024, China

<sup>c</sup>Institute of Environmental Sciences (CML), Leiden University, Leiden, The  
Netherlands

<sup>d</sup>National Institute of Public Health and the Environment (RIVM), Center for Safety  
of Substances and Products, Bilthoven, The Netherlands

\*Corresponding author. Phone: +86-431-89165617; e-mail: quj100@nenu.edu.cn

Number of texts: 1; Number of figures: 6; Number of tables: 3; Number of pages: 9

### Table of Contents

|                 |    |
|-----------------|----|
| Text S1.....    | S2 |
| Figure S1.....  | S3 |
| Figure S2.....  | S3 |
| Figure S3.....  | S4 |
| Figure S4.....  | S4 |
| Figure S5.....  | S5 |
| Figure S6.....  | S5 |
| Table S1.....   | S6 |
| Table S2.....   | S7 |
| Table S3.....   | S8 |
| References..... | S9 |

**Text S1. Calculation of photolysis rate constant and molar absorptivity for different species of OTC.**

OTC photolysis followed pseudo-first order kinetics. The apparent degradation rate contributes by each component in the system:

$$-\frac{dc}{dt} = k_{\text{obs}} \cdot c = k_1 \cdot c_1 + k_2 \cdot c_2 + \cdots + k_i \cdot c_i \quad (1)$$

where  $c$  is the concentration of different species,  $k_{\text{obs}}$  ( $\text{min}^{-1}$ ) is the observed first order rate constant of OTC in different pH solutions,  $k_i$  ( $\text{min}^{-1}$ ) is the first order rate constant of each individual species. The equation can be changed to:

$$k_{\text{obs}} = \alpha_1 \cdot k_1 + \alpha_2 \cdot k_2 + \cdots + \alpha_i \cdot k_i \quad (2)$$

where  $\alpha_i$  is the fraction of each species at different pH and at different time during the irradiation. The  $\alpha_i$  values can be calculated with the pKa (3.22, 7.46, and 8.94) of OTC as the time tends to be zero at the initial time.

Set  $A$ ,  $K_{\text{obs}}$ ,  $K_i$  as the matrix of  $\alpha_1 \sim \alpha_{ij}$ ,  $k_{\text{obs}}^1 \sim k_{\text{obs}}^j$ , and  $k^1 \sim k^i$ .  $i$  represents the total number of species (4 in this study).  $j$  represents the total pH conditions (6 in this study). The independent rate constant of each species was then derived with:

$$K_i = (A^{-1} \cdot A)^T \cdot A^{-1} \cdot K_{\text{obs}} \quad (3)$$

While calculating the molar absorptivity for different species of OTC,  $K_{\text{obs}}$  and  $K_i$  were replaced by  $E_j$  and  $E_i$ , which are the matrix of molar absorptivity for OTC at different pH and for each species of OTC, respectively.

The quantum yield of each OTC species was calculated from the individual rate constant and the molar absorption coefficient with the following equation:<sup>1</sup>

$$\Phi = \frac{-k_i}{2.303 \Sigma (I_{\lambda} \cdot \varepsilon_{\lambda}) (S / V) l} \quad (4)$$

Where  $I_{\lambda}$  is the incident light intensity at wavelength  $\lambda$  ( $\text{Einstein cm}^{-2} \text{ s}^{-1}$ );  $\varepsilon_{\lambda}$  is the molar absorption coefficient of OTC ( $\text{cm}^{-1} \text{ L mol}^{-1}$ );  $S$  is the exposed area ( $\text{cm}^2$ );  $V$  is the volume of solution (mL);  $l$  is the light path length (cm).

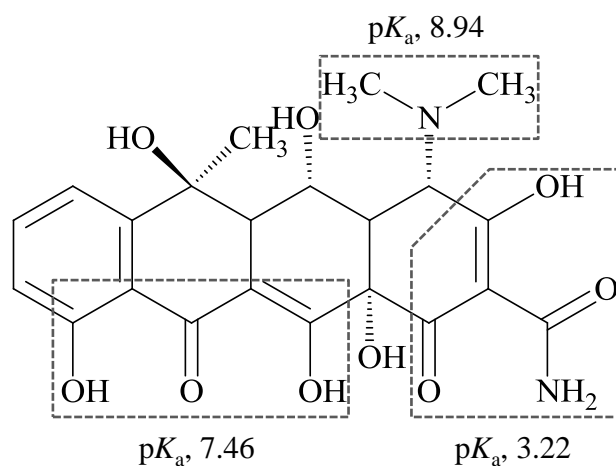

**Fig. S1** Molecular structure and dissociation positions of ciprofloxacin.

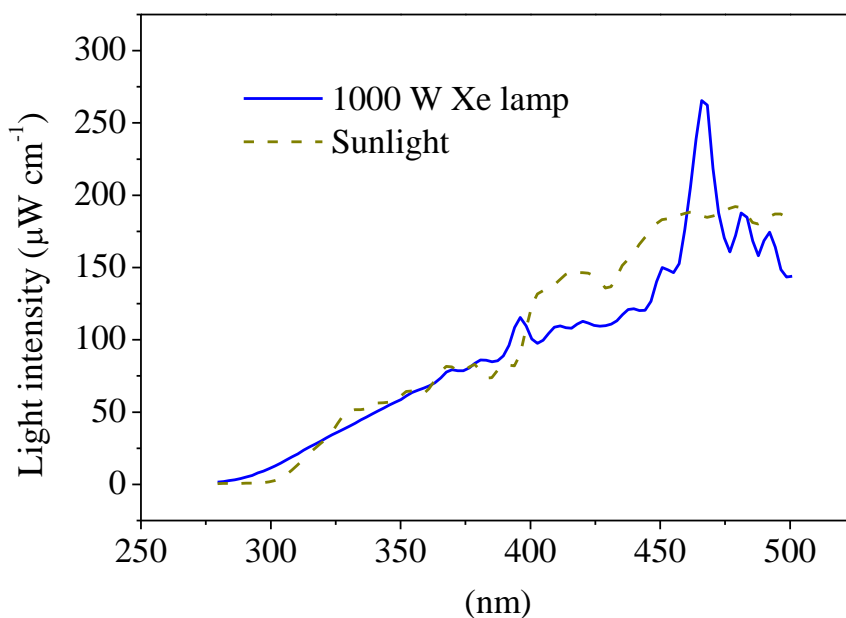

**Fig. S2** The 1000 W Xe lamp and sunlight irradiation spectra (The sunlight irradiation spectrum was measured at midsummer in Dalian, China ( $38^{\circ}53'29.9''\text{N}$  and  $121^{\circ}32'4.1''\text{E}$ )).

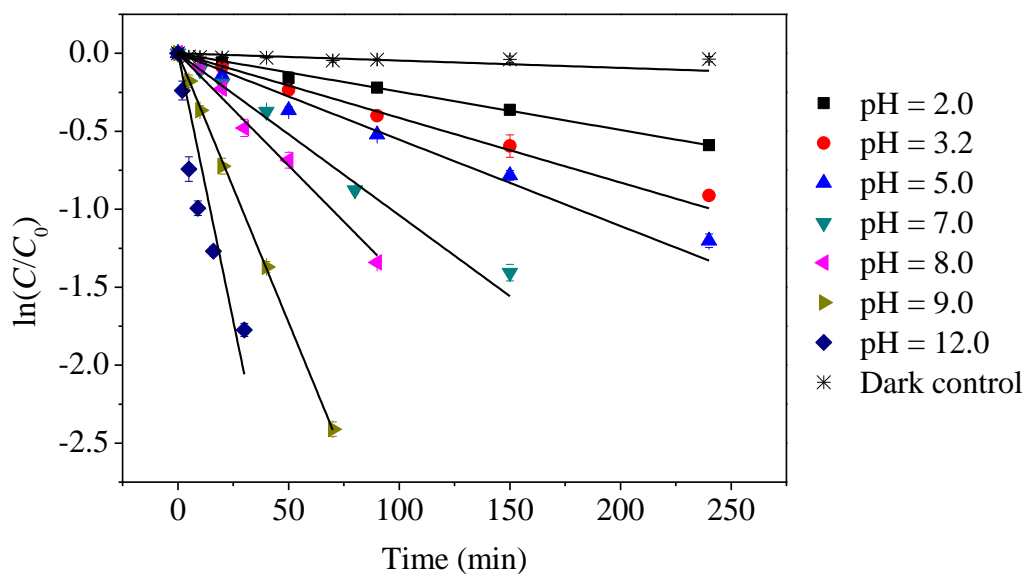

**Fig. S3** Direct photolysis kinetics of OTC at different pH.

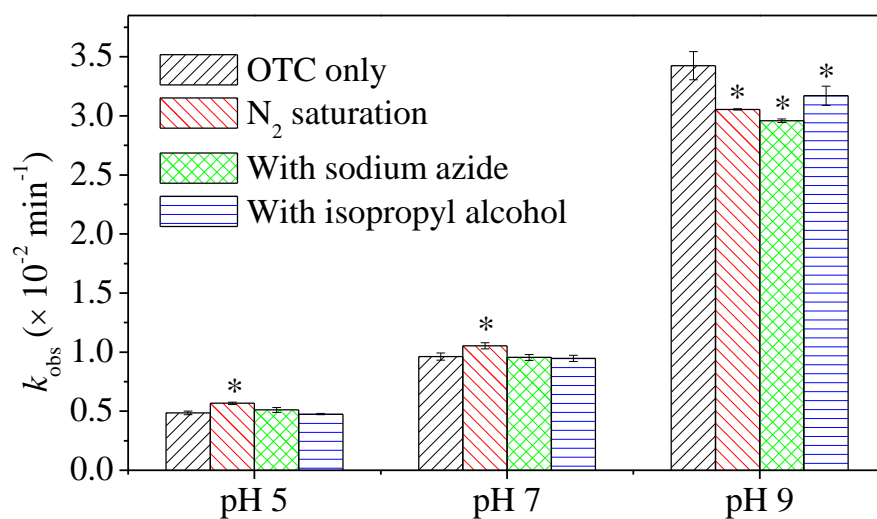

**Fig. S4** Observed first-order photolysis rate constants ( $k_{\text{obs}}$ ) of OTC in different conditions (\* stands for significant difference,  $p < 0.05$ ,  $n = 3$ ; the error bars represent the 95% confidence interval,  $n = 3$ ).

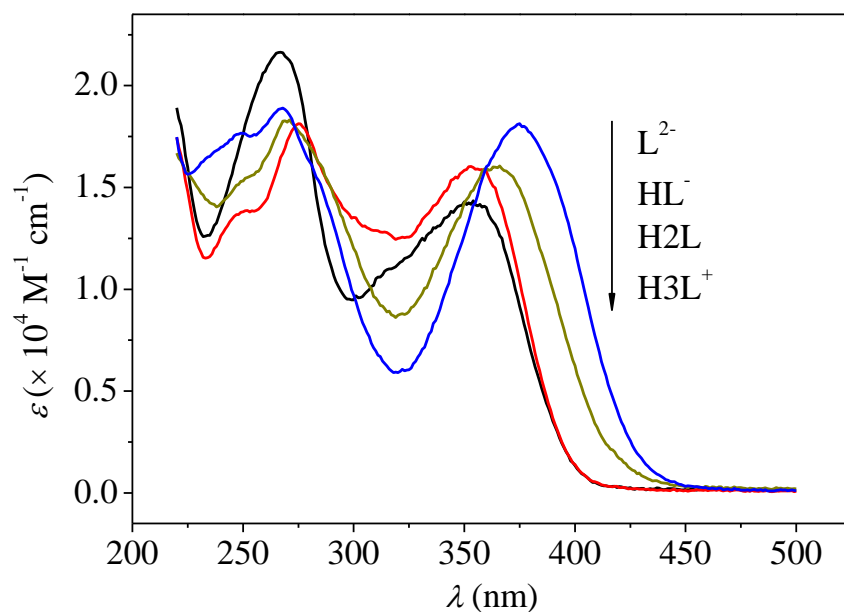

**Fig. S5** Calculated molar absorptivity of different species of OTC.

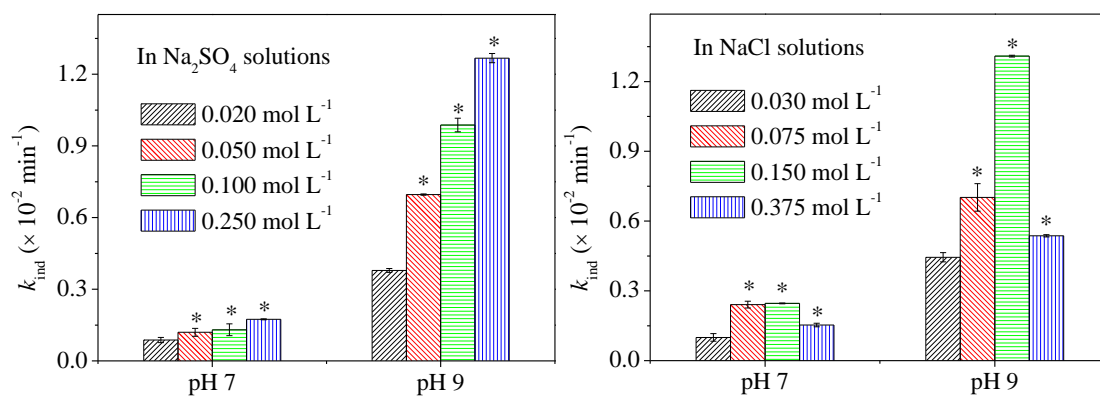

**Fig. S6** SRNOM induced indirect photolysis rate constants ( $k_{\text{ind}}$ ) of OTC in  $\text{Na}_2\text{SO}_4$  and  $\text{NaCl}$  solutions at pH 7.0 and 9.0 (\* stands for significant difference,  $p < 0.05$ ,  $n = 3$ ; the error bars represent the 95% confidence interval,  $n = 3$ ).

81

**Table S1** Fractions of  $\text{H3L}^+$ ,  $\text{H2L}$ ,  $\text{HL}^-$ , and  $\text{L}^{2-}$  in different pH solutions.

| pH   | $\text{H3L}^+$ | $\text{H2L}$ | $\text{HL}^-$ | $\text{L}^{2-}$ |
|------|----------------|--------------|---------------|-----------------|
| 2.0  | 0.943          | 0.057        | 0.000         | 0.000           |
| 3.2  | 0.511          | 0.489        | 0.000         | 0.000           |
| 5.0  | 0.016          | 0.980        | 0.004         | 0.000           |
| 6.0  | 0.002          | 0.965        | 0.033         | 0.000           |
| 7.0  | 0.000          | 0.740        | 0.257         | 0.003           |
| 8.0  | 0.000          | 0.205        | 0.713         | 0.082           |
| 9.0  | 0.000          | 0.013        | 0.459         | 0.528           |
| 12.0 | 0.000          | 0.000        | 0.001         | 0.999           |

82

\*The fractions were calculated with  $pK_a$  of 3.22, 7.46, and 8.94 for OTC

83

**Table S2** Observed first-order photolysis rate constants ( $k_{\text{obs}}$ ) of OTC in the absence and presence of SRNOM, integrated light screening coefficient ( $S_{290-455}$ ) of SRNOM, SRNOM induced indirect photolysis rate constants ( $k_{\text{ind}}$ ) of OTC in different pH solutions, and the percentage of  $k_{\text{ind}}$  ( $P_{\text{ind}}$ ) (The unit for  $k_{\text{obs}}$  and  $k_{\text{ind}}$  is  $\times 10^{-2} \text{ min}^{-1}$ )

| pH   | $k_{\text{obs}}$ | With 5 mg L <sup>-1</sup> SRNOM |               |                  |                    | With 10 mg L <sup>-1</sup> SRNOM |               |                  |                    |
|------|------------------|---------------------------------|---------------|------------------|--------------------|----------------------------------|---------------|------------------|--------------------|
|      |                  | $k_{\text{obs}}$                | $S_{290-455}$ | $k_{\text{ind}}$ | $P_{\text{ind}}$ % | $k_{\text{obs}}$                 | $S_{290-455}$ | $k_{\text{ind}}$ | $P_{\text{ind}}$ % |
| 2.0  | 0.239 ± 0.007    | 0.233 ± 0.003                   | 0.737         | 0.056 ± 0.005    | 24.2               | 0.146 ± 0.006                    | 0.703         | -0.022 ± 0.006   | -15.2              |
| 3.2  | 0.378 ± 0.012    | 0.311 ± 0.006                   | 0.716         | 0.040 ± 0.009    | 13.0               | 0.275 ± 0.010                    | 0.682         | 0.017 ± 0.007    | 6.2                |
| 5.0  | 0.486 ± 0.013    | 0.414 ± 0.005                   | 0.708         | 0.070 ± 0.009    | 16.9               | 0.405 ± 0.010                    | 0.671         | 0.079 ± 0.008    | 19.5               |
| 7.0  | 0.963 ± 0.014    | 0.911 ± 0.03                    | 0.721         | 0.216 ± 0.007    | 23.7               | 0.787 ± 0.026                    | 0.693         | 0.120 ± 0.007    | 15.2               |
| 8.0  | 1.520 ± 0.021    | 1.433 ± 0.025                   | 0.729         | 0.325 ± 0.008    | 22.7               | 1.340 ± 0.050                    | 0.704         | 0.270 ± 0.007    | 20.2               |
| 9.0  | 3.425 ± 0.054    | 3.167 ± 0.067                   | 0.716         | 0.714 ± 0.009    | 22.5               | 3.054 ± 0.040                    | 0.695         | 0.674 ± 0.007    | 22.1               |
| 12.0 | 5.572 ± 0.078    | 5.027 ± 0.110                   | 0.703         | 1.112 ± 0.007    | 22.1               | 5.011 ± 0.110                    | 0.668         | 1.287 ± 0.007    | 25.7               |

\*The errors of  $k_{\text{obs}}$  and  $k_{\text{ind}}$  represent 95% confidence levels,  $n = 3$ .

**Table S3** Observed first-order photolysis rate constants ( $k_{\text{obs}}$ ) of OTC in the absence and presence of SRNOM in Na<sub>2</sub>SO<sub>4</sub>, NaCl, and NaBr solutions with the same ionic strength at different pH (The unit for  $k_{\text{obs}}$  is  $\times 10^{-2} \text{ min}^{-1}$ ).

| Conditions                                                               |             | pH                |                   |                   |                   |
|--------------------------------------------------------------------------|-------------|-------------------|-------------------|-------------------|-------------------|
|                                                                          |             | 6.0               | 7.0               | 8.0               | 9.0               |
| Na <sub>2</sub> SO <sub>4</sub>                                          | OTC         | 0.849 $\pm$ 0.041 | 0.963 $\pm$ 0.006 | 1.520 $\pm$ 0.001 | 3.425 $\pm$ 0.079 |
|                                                                          | OTC + SRNOM | 0.648 $\pm$ 0.013 | 0.787 $\pm$ 0.006 | 1.340 $\pm$ 0.018 | 3.054 $\pm$ 0.097 |
| NaCl<br>0.075 mol L <sup>-1</sup>                                        | OTC         | 0.864 $\pm$ 0.018 | 0.971 $\pm$ 0.015 | 1.526 $\pm$ 0.011 | 3.568 $\pm$ 0.013 |
|                                                                          | OTC + SRNOM | 0.666 $\pm$ 0.012 | 0.914 $\pm$ 0.025 | 1.441 $\pm$ 0.015 | 3.173 $\pm$ 0.068 |
| NaBr<br>0.075 mol L <sup>-1</sup>                                        | OTC         | 0.900 $\pm$ 0.018 | 1.025 $\pm$ 0.006 | 1.548 $\pm$ 0.007 | 3.820 $\pm$ 0.096 |
|                                                                          | OTC + SRNOM | 0.711 $\pm$ 0.010 | 1.031 $\pm$ 0.025 | 1.506 $\pm$ 0.044 | 3.516 $\pm$ 0.035 |
| NaBr (0.80 mmol L <sup>-1</sup> ) +<br>Na <sub>2</sub> SO <sub>4</sub>   | OTC         | 0.852 $\pm$ 0.021 | 0.965 $\pm$ 0.016 | 1.535 $\pm$ 0.015 | 3.597 $\pm$ 0.042 |
|                                                                          | OTC + SRNOM | 0.651 $\pm$ 0.012 | 0.795 $\pm$ 0.010 | 1.402 $\pm$ 0.024 | 3.195 $\pm$ 0.114 |
| NaCl (0.075 mol L <sup>-1</sup> ) +<br>NaBr (0.80 mmol L <sup>-1</sup> ) | OTC         | 0.858 $\pm$ 0.015 | 0.964 $\pm$ 0.012 | 1.515 $\pm$ 0.014 | 3.562 $\pm$ 0.019 |
|                                                                          | OTC + SRNOM | 0.694 $\pm$ 0.013 | 1.013 $\pm$ 0.025 | 1.501 $\pm$ 0.015 | 3.453 $\pm$ 0.058 |

\*The errors of  $k_{\text{obs}}$  represent 95% confidence levels,  $n = 3$ .

## References

1. X. Jin, H. Xu, S. Qiu, M. Jia, F. Wang, A. Zhang and X. Jiang, Direct photolysis of oxytetracycline: Influence of initial concentration, pH and temperature, *J. Photochem. Photobiol. A–Chem.*, 2017, **332**, 224–231.
